# Supplementary material for: Inferring network properties based on the epidemic prevalence
Source: Springer Nature journal article supplement (doi:10.1007/s41109-019-0218-0), 2019-10-29
Supplement: 41109_2019_218_MOESM1_ESM.pdf [file 41109_2019_218_MOESM1_ESM.pdf]

# Supplementary material for inferring network properties based on the epidemic prevalence

Long Ma, Qiang Liu, and Piet Van Mieghem

Delft University of Technology

## 1 Inferring network metrics given the network type

| Metric      | Mean absolute error (MAE) |                       | Mean squared error (MSE) |                       |
|-------------|---------------------------|-----------------------|--------------------------|-----------------------|
|             | Treatment group           | Control group         | Treatment group          | Control group         |
| $E[D]$      | 0.381                     | 1.34                  | 0.239                    | 2.69                  |
| $E[D^2]$    | 4.79                      | 17.5                  | 38.7                     | $4.67 \times 10^2$    |
| $\lambda_1$ | 0.372                     | 1.31                  | 0.219                    | 2.55                  |
| $E[H]$      | 0.201                     | 0.435                 | $6.46 \times 10^{-2}$    | 0.297                 |
| $E[1/H]$    | $1.90 \times 10^{-2}$     | $3.73 \times 10^{-2}$ | $5.74 \times 10^{-4}$    | $2.17 \times 10^{-3}$ |
| $d_{max}$   | 1.46                      | 2.50                  | 3.71                     | 9.95                  |
| $C_G$       | $6.54 \times 10^{-3}$     | $8.31 \times 10^{-3}$ | $7.46 \times 10^{-5}$    | $1.12 \times 10^{-4}$ |
| $\mu_{N-1}$ | 0.177                     | 0.312                 | $6.54 \times 10^{-2}$    | 0.173                 |
| $\rho_D$    | $3.44 \times 10^{-2}$     | $3.46 \times 10^{-2}$ | $1.82 \times 10^{-3}$    | $1.89 \times 10^{-3}$ |
| $N$         | 95.0                      | $1.00 \times 10^2$    | $1.39 \times 10^4$       | $1.53 \times 10^4$    |

Table 1: MAE and MSE of different network metrics when the benchmark networks are ER networks. The effective infection rate is set as  $\tau = 1$  and the initial state  $y_0 = 0.2$ . The mean errors are obtained by averaging over 1000 ER benchmark networks.

| Metric      | Mean absolute error (MAE) |                       | Mean squared error (MSE) |                       |
|-------------|---------------------------|-----------------------|--------------------------|-----------------------|
|             | Treatment group           | Control group         | Treatment group          | Control group         |
| $E[D]$      | 0.434                     | 1.36                  | 0.458                    | 2.97                  |
| $E[D^2]$    | 0.757                     | 16.2                  | 13.1                     | $4.95 \times 10^2$    |
| $\lambda_1$ | $9.12 \times 10^{-2}$     | 1.41                  | $7.34 \times 10^{-2}$    | 3.50                  |
| $E[H]$      | 0.190                     | 0.627                 | $6.03 \times 10^{-2}$    | 0.625                 |
| $E[1/H]$    | $1.63 \times 10^{-2}$     | $4.62 \times 10^{-2}$ | $4.51 \times 10^{-4}$    | $3.32 \times 10^{-3}$ |
| $d_{max}$   | 1.05                      | 2.45                  | 2.01                     | 9.35                  |
| $C_G$       | $1.89 \times 10^{-2}$     | $2.35 \times 10^{-2}$ | $6.58 \times 10^{-4}$    | $9.60 \times 10^{-4}$ |
| $\mu_{N-1}$ | $8.63 \times 10^{-2}$     | 0.629                 | $2.24 \times 10^{-2}$    | 0.703                 |
| $\rho_D$    | $3.42 \times 10^{-2}$     | $4.06 \times 10^{-2}$ | $1.88 \times 10^{-3}$    | $2.61 \times 10^{-3}$ |
| $N$         | 91.2                      | $1.04 \times 10^2$    | $1.31 \times 10^4$       | $1.59 \times 10^4$    |

Table 2: MAE and MSE of different network metrics when the benchmark networks are WS networks. The parameter settings are the same as Tab. 1.

| Metric      | Mean absolute error (MAE) |                       | Mean squared error (MSE) |                       |
|-------------|---------------------------|-----------------------|--------------------------|-----------------------|
|             | Treatment group           | Control group         | Treatment group          | Control group         |
| $E[D]$      | $3.60 \times 10^{-2}$     | 1.44                  | $7.19 \times 10^{-2}$    | 3.72                  |
| $E[D^2]$    | 6.57                      | 31.9                  | 85.3                     | $1.62 \times 10^3$    |
| $\lambda_1$ | 0.820                     | 2.36                  | 1.09                     | 8.46                  |
| $E[H]$      | 0.123                     | 0.332                 | $2.55 \times 10^{-2}$    | 0.177                 |
| $E[1/H]$    | $1.49 \times 10^{-2}$     | $3.44 \times 10^{-2}$ | $3.69 \times 10^{-4}$    | $1.83 \times 10^{-3}$ |
| $d_{max}$   | 13.6                      | 15.1                  | $3.08 \times 10^2$       | $3.69 \times 10^2$    |
| $C_G$       | $1.84 \times 10^{-2}$     | $1.98 \times 10^{-2}$ | $5.75 \times 10^{-4}$    | $6.15 \times 10^{-4}$ |
| $\mu_{N-1}$ | $9.14 \times 10^{-2}$     | 0.551                 | $4.27 \times 10^{-2}$    | 0.520                 |
| $\rho_D$    | $2.39 \times 10^{-2}$     | $3.16 \times 10^{-2}$ | $9.53 \times 10^{-4}$    | $1.55 \times 10^{-3}$ |
| $N$         | 97.3                      | $1.01 \times 10^2$    | $1.47 \times 10^4$       | $1.55 \times 10^4$    |

Table 3: MAE and MSE of different network metrics when the benchmark networks are BA networks. The parameter settings are the same as Tab. 1.

| Metric      | Mean absolute error (MAE) |                       | Mean squared error (MSE) |                       |
|-------------|---------------------------|-----------------------|--------------------------|-----------------------|
|             | Treatment group           | Control group         | Treatment group          | Control group         |
| $E[D]$      | 0.151                     | 0.300                 | 0.216                    | 2.86                  |
| $E[D^2]$    | 17.9                      | 35.2                  | $5.37 \times 10^2$       | $1.88 \times 10^3$    |
| $\lambda_1$ | 1.83                      | 2.73                  | 5.17                     | 11.2                  |
| $E[H]$      | $2.38 \times 10^{-2}$     | 0.137                 | $3.61 \times 10^{-2}$    | 0.141                 |
| $E[1/H]$    | $1.70 \times 10^{-2}$     | $2.92 \times 10^{-2}$ | $4.51 \times 10^{-4}$    | $1.32 \times 10^{-3}$ |
| $d_{max}$   | 18.7                      | 23.6                  | $5.46 \times 10^2$       | $8.52 \times 10^2$    |
| $C_G$       | $2.34 \times 10^{-2}$     | $2.71 \times 10^{-2}$ | $8.57 \times 10^{-4}$    | $1.17 \times 10^{-3}$ |
| $\mu_{N-1}$ | 0.124                     | 0.173                 | $2.60 \times 10^{-2}$    | $4.90 \times 10^{-2}$ |
| $\rho_D$    | $2.74 \times 10^{-2}$     | $3.02 \times 10^{-2}$ | $1.19 \times 10^{-3}$    | $1.42 \times 10^{-3}$ |
| $N$         | 94.6                      | $1.02 \times 10^2$    | $1.37 \times 10^4$       | $1.56 \times 10^4$    |

Table 4: MAE and MSE of different network metrics when the benchmark networks are SF networks. The parameter settings are the same as Tab. 1.
